# Supplementary material for: Influence of relative NK–DC abundance on placentation and its relation to epigenetic programming in the offspring
Source: PubMed Central journal article supplement — Cell Death Dis. 2014 Aug 28;5(8):e1392–. doi: 10.1038/cddis.2014.353 (PMC4454325; doi:10.1038/cddis.2014.353), 2014-08-28
Supplement: cddis2014353x2.pdf [file cddis2014353x2.pdf]

**Supplemental Table 2:** Overview of the pyrosequencing data obtained during this study. Shown are methylation percentages for candidate gene promoters per CpG and the average (total) methylation over all CpG's combined according to developmental stage (E13 and PN4) and treatment (Control, aNK and eDC)

| PPARA     |     |        |            |            |            |            |            |            |            |             |
|-----------|-----|--------|------------|------------|------------|------------|------------|------------|------------|-------------|
| Treatment | Age | Tissue | Ppara_CpG1 | Ppara_CpG2 | Ppara_CpG3 | Ppara_CpG4 | Ppara_CpG5 | Ppara_CpG6 | Ppara_CpG7 | Ppara_Total |
| Control   | E13 | Brain  | 3,4        | 2,6        | 1,7        | 1,2        | 1,3        | 2,7        | 1,1        | 1,97        |
| Control   | E13 | Brain  | 4,3        | 2,8        | 1,4        | 1,4        | 1,3        | 3,6        | 0,8        | 2,22        |
| Control   | E13 | Brain  | 3,7        | 2,4        | 1,6        | 1,8        | 1,0        | 3,3        | 1,1        | 2,12        |
| Control   | E13 | Brain  | 3,9        | 2,0        | 1,4        | 1,4        | 1,3        | 3,5        | 0,9        | 2,05        |
| aNK       | E13 | Brain  | 3,6        | 2,0        | 1,3        | 1,5        | 1,1        | 3,2        | 1,0        | 1,95        |
| aNK       | E13 | Brain  | 4,3        | 2,2        | 1,5        | 1,6        | 1,3        | 3,6        | 1,0        | 2,22        |
| aNK       | E13 | Brain  | 4,0        | 2,3        | 1,3        | 1,7        | 1,2        | 3,4        | 0,7        | 2,08        |
| aNK       | E13 | Brain  | 4,2        | 2,4        | 1,6        | 1,4        | 1,2        | 3,6        | 0,9        | 2,18        |
| eDC       | E13 | Brain  | 4,0        | 2,3        | 1,6        | 1,4        | 1,2        | 3,4        | 0,9        | 2,12        |
| eDC       | E13 | Brain  | 4,1        | 2,0        | 1,5        | 1,5        | 1,3        | 3,3        | 0,8        | 2,08        |
| eDC       | E13 | Brain  | 4,1        | 2,2        | 1,5        | 1,3        | 1,4        | 3,4        | 0,8        | 2,09        |
| eDC       | E13 | Brain  | 4,2        | 1,9        | 1,5        | 1,6        | 1,1        | 3,3        | 0,6        | 2,01        |
| Control   | PN4 | Brain  | 3,8        | 2,7        | 1,7        | 1,4        | 2,1        | 3,0        | 1,3        | 2,26        |
| Control   | PN4 | Brain  | 4,2        | 1,8        | 1,5        | 1,4        | 1,1        | 3,5        | 0,8        | 2,03        |
| Control   | PN4 | Brain  | 3,9        | 2,3        | 1,4        | 1,6        | 1,5        | 3,4        | 1,0        | 2,14        |
| Control   | PN4 | Brain  | 4,1        | 2,2        | 1,2        | 1,4        | 1,4        | 3,5        | 0,8        | 2,07        |
| aNK       | PN4 | Brain  | 3,8        | 2,2        | 1,2        | 1,3        | 1,3        | 3,6        | 0,7        | 2,02        |
| aNK       | PN4 | Brain  | 4,3        | 2,2        | 1,5        | 1,3        | 1,3        | 3,6        | 1,0        | 2,17        |
| aNK       | PN4 | Brain  | 4,0        | 2,3        | 1,2        | 1,2        | 1,2        | 3,6        | 0,8        | 2,04        |
| aNK       | PN4 | Brain  | 4,3        | 2,7        | 1,3        | 1,5        | 1,3        | 3,1        | 1,0        | 2,17        |
| eDC       | PN4 | Brain  | 3,8        | 2,1        | 1,4        | 1,6        | 1,1        | 3,7        | 0,8        | 2,07        |
| eDC       | PN4 | Brain  | 3,8        | 2,0        | 1,3        | 1,4        | 1,2        | 3,5        | 0,6        | 1,96        |
| eDC       | PN4 | Brain  | 4,0        | 2,2        | 1,2        | 1,5        | 1,6        | 3,7        | 0,8        | 2,15        |
| eDC       | PN4 | Brain  | 4,3        | 2,2        | 1,3        | 1,3        | 1,2        | 3,3        | 0,7        | 2,04        |
| Control   | E13 | Liver  | 3,8        | 2,0        | 1,4        | 1,7        | 1,3        | 4,1        | 1,1        | 2,19        |
| Control   | E13 | Liver  | 4,1        | 2,2        | 1,4        | 1,6        | 1,3        | 3,3        | 1,1        | 2,12        |
| Control   | E13 | Liver  | 4,4        | 2,6        | 1,8        | 1,8        | 1,4        | 3,0        | 0,8        | 2,24        |
| Control   | E13 | Liver  | 3,9        | 2,3        | 1,5        | 1,3        | 1,2        | 3,8        | 0,9        | 2,13        |
| aNK       | E13 | Liver  | 4,9        | 2,3        | 1,5        | 1,7        | 1,5        | 3,4        | 0,9        | 2,32        |
| aNK       | E13 | Liver  | 4,9        | 5,8        | 3,8        | 3,4        | 5,2        | 3,8        | 3,4        | 4,34        |
| aNK       | E13 | Liver  | 4,2        | 2,1        | 1,4        | 1,6        | 1,4        | 3,6        | 0,8        | 2,14        |
| aNK       | E13 | Liver  | 4,1        | 2,5        | 1,3        | 1,5        | 1,3        | 3,2        | 0,9        | 2,11        |
| eDC       | E13 | Liver  | 4,1        | 2,4        | 1,6        | 1,5        | 1,5        | 3,3        | 0,8        | 2,16        |
| eDC       | E13 | Liver  | 4,2        | 2,4        | 1,5        | 1,5        | 1,5        | 3,5        | 0,8        | 2,18        |
| eDC       | E13 | Liver  | 4,1        | 1,9        | 1,4        | 1,7        | 1,5        | 3,9        | 1,0        | 2,20        |
| eDC       | E13 | Liver  | 4,0        | 2,2        | 1,4        | 1,4        | 1,2        | 3,6        | 1,1        | 2,14        |
| Control   | PN4 | Liver  | 4,4        | 2,3        | 1,5        | 1,6        | 1,5        | 3,5        | 1,1        | 2,29        |
| Control   | PN4 | Liver  | 4,0        | 2,1        | 1,4        | 1,5        | 1,2        | 3,3        | 0,9        | 2,05        |
| Control   | PN4 | Liver  | 4,1        | 2,3        | 1,5        | 1,3        | 1,4        | 3,5        | 1,1        | 2,16        |
| Control   | PN4 | Liver  | 3,9        | 2,3        | 1,5        | 1,3        | 1,1        | 3,5        | 0,8        | 2,05        |
| aNK       | PN4 | Liver  | 4,2        | 2,1        | 1,3        | 1,4        | 1,0        | 3,6        | 0,8        | 2,04        |
| aNK       | PN4 | Liver  | 4,1        | 2,3        | 1,4        | 1,4        | 1,2        | 3,7        | 0,8        | 2,14        |
| aNK       | PN4 | Liver  | 4,4        | 1,8        | 1,5        | 1,4        | 1,2        | 3,5        | 0,8        | 2,09        |
| aNK       | PN4 | Liver  | 4,4        | 2,2        | 1,4        | 1,3        | 1,3        | 3,7        | 0,9        | 2,17        |
| eDC       | PN4 | Liver  | 4,0        | 2,2        | 1,3        | 1,4        | 1,3        | 3,3        | 0,9        | 2,05        |
| eDC       | PN4 | Liver  | 4,0        | 2,1        | 1,3        | 1,1        | 1,1        | 3,5        | 0,8        | 1,99        |
| eDC       | PN4 | Liver  | 3,8        | 2,5        | 1,4        | 1,5        | 1,4        | 3,6        | 1,1        | 2,17        |
| eDC       | PN4 | Liver  | 3,8        | 2,3        | 1,3        | 1,1        | 1,3        | 3,5        | 1,0        | 2,04        |
| Control   | E13 | Kidney | 4,2        | 2,4        | 1,5        | 1,6        | 1,5        | 3,6        | 1,1        | 2,26        |
| Control   | E13 | Kidney | 6,3        | 5,8        | 4,5        | 4,3        | 4,0        | 4,6        | 4,4        | 4,83        |
| Control   | E13 | Kidney | 4,1        | 2,1        | 1,5        | 1,4        | 1,2        | 3,6        | 1,0        | 2,12        |
| Control   | E13 | Kidney | 4,3        | 2,1        | 1,7        | 1,4        | 0,9        | 3,5        | 0,0        | 1,98        |
| aNK       | E13 | Kidney | 3,9        | 2,4        | 1,5        | 1,2        | 1,1        | 3,7        | 0,8        | 2,09        |
| aNK       | E13 | Kidney | 4,2        | 2,6        | 1,6        | 1,4        | 1,4        | 3,7        | 1,1        | 2,28        |
| aNK       | E13 | Kidney | 4,0        | 2,2        | 1,3        | 1,6        | 1,3        | 3,6        | 0,8        | 2,09        |
| aNK       | E13 | Kidney | 3,8        | 2,5        | 1,5        | 1,4        | 1,2        | 3,6        | 1,0        | 2,15        |
| eDC       | E13 | Kidney | 4,4        | 2,2        | 1,3        | 1,5        | 1,5        | 4,0        | 1,1        | 2,29        |
| eDC       | E13 | Kidney | 4,0        | 2,2        | 1,1        | 1,3        | 1,1        | 3,7        | 1,0        | 2,06        |
| eDC       | E13 | Kidney | 3,9        | 2,1        | 1,5        | 1,4        | 1,1        | 4,0        | 0,9        | 2,13        |
| eDC       | E13 | Kidney | 4,2        | 2,3        | 1,3        | 1,4        | 1,1        | 3,3        | 0,8        | 2,03        |
| Control   | PN4 | Kidney | 4,5        | 2,5        | 1,5        | 1,5        | 1,7        | 3,8        | 1,1        | 2,38        |
| Control   | PN4 | Kidney | 4,0        | 2,3        | 1,3        | 1,3        | 1,3        | 3,3        | 0,7        | 2,02        |
| Control   | PN4 | Kidney | 4,3        | 2,1        | 1,5        | 1,4        | 1,3        | 3,6        | 1,2        | 2,16        |
| Control   | PN4 | Kidney | 3,8        | 2,2        | 1,3        | 1,4        | 1,3        | 3,6        | 0,8        | 2,05        |
| aNK       | PN4 | Kidney | 3,9        | 2,1        | 1,5        | 1,8        | 1,3        | 3,9        | 0,8        | 2,17        |
| aNK       | PN4 | Kidney | 3,9        | 2,4        | 1,2        | 1,6        | 1,6        | 3,7        | 1,2        | 2,23        |
| aNK       | PN4 | Kidney | 3,8        | 2,3        | 1,1        | 1,2        | 1,2        | 3,4        | 0,7        | 1,97        |
| aNK       | PN4 | Kidney | 3,8        | 2,2        | 1,6        | 1,6        | 1,2        | 4,4        | 1,1        | 2,28        |
| eDC       | PN4 | Kidney | 4,9        | 2,5        | 1,3        | 1,4        | 1,2        | 3,5        | 1,1        | 2,27        |
| eDC       | PN4 | Kidney | 3,9        | 2,0        | 1,4        | 1,4        | 1,1        | 3,6        | 0,7        | 2,00        |
| eDC       | PN4 | Kidney | 3,9        | 2,0        | 1,4        | 1,3        | 1,5        | 3,8        | 1,1        | 2,13        |
| eDC       | PN4 | Kidney | 4,3        | 2,3        | 1,3        | 1,2        | 1,4        | 3,7        | 0,7        | 2,12        |

**HNf4A**

| Treatment | Age | Tissue | Hnf4a_P1_CpG1 | Hnf4a_P1_CpG2 | Hnf4a_P1_CpG3 | Hnf4a_Total |
|-----------|-----|--------|---------------|---------------|---------------|-------------|
| Control   | E13 | Brain  | 95,5          | 93,7          | 89,3          | 92,85       |
| Control   | E13 | Brain  | 97,9          | 92,0          | 88,5          | 92,81       |
| Control   | E13 | Brain  | 94,8          | 92,0          | 88,6          | 91,78       |
| Control   | E13 | Brain  | 95,9          | 92,6          | 86,5          | 91,65       |
| aNK       | E13 | Brain  | 95,2          | 91,2          | 91,1          | 92,48       |
| aNK       | E13 | Brain  | 96,9          | 94,3          | 92,7          | 94,63       |
| aNK       | E13 | Brain  | 95,3          | 92,8          | 90,6          | 92,87       |
| aNK       | E13 | Brain  | 96,8          | 93,9          | 87,8          | 92,84       |
| eDC       | E13 | Brain  | 93,9          | 86,1          | 87,2          | 89,07       |
| eDC       | E13 | Brain  | 96,6          | 91,5          | 86,7          | 91,59       |
| eDC       | E13 | Brain  | 93,7          | 92,5          | 91,1          | 92,42       |
| eDC       | E13 | Brain  | 97,4          | 90,5          | 85,4          | 91,08       |
| Control   | PN4 | Brain  | 96,9          | 93,5          | 87,4          | 92,57       |
| Control   | PN4 | Brain  | 97,6          | 92,8          | 86,7          | 92,35       |
| Control   | PN4 | Brain  | 94,4          | 93,1          | 90,9          | 92,79       |
| Control   | PN4 | Brain  | 96,0          | 91,6          | 89,5          | 92,34       |
| aNK       | PN4 | Brain  | 94,6          | 95,0          | 89,0          | 92,85       |
| aNK       | PN4 | Brain  | 96,8          | 94,3          | 91,6          | 94,22       |
| aNK       | PN4 | Brain  | 97,7          | 93,9          | 91,3          | 94,31       |
| aNK       | PN4 | Brain  | 96,1          | 90,7          | 87,2          | 91,35       |
| eDC       | PN4 | Brain  | 96,3          | 94,6          | 89,2          | 93,35       |
| eDC       | PN4 | Brain  | 94,7          | 92,3          | 89,9          | 92,27       |
| eDC       | PN4 | Brain  | 97,7          | 92,8          | 92,0          | 94,12       |
| eDC       | PN4 | Brain  | 97,0          | 91,8          | 89,5          | 92,77       |
| Control   | E13 | Liver  | 71,7          | 69,8          | 69,7          | 70,39       |
| Control   | E13 | Liver  | 65,7          | 66,7          | 70,1          | 67,52       |
| Control   | E13 | Liver  | 73,8          | 72,0          | 69,7          | 71,87       |
| Control   | E13 | Liver  | 69,7          | 70,6          | 72,0          | 70,74       |
| aNK       | E13 | Liver  | 71,1          | 70,2          | 70,6          | 70,66       |
| aNK       | E13 | Liver  | 69,8          | 70,1          | 71,2          | 70,34       |
| aNK       | E13 | Liver  | 74,7          | 69,1          | 62,1          | 68,62       |
| aNK       | E13 | Liver  | 64,5          | 68,9          | 70,1          | 67,82       |
| eDC       | E13 | Liver  | 71,4          | 70,2          | 68,3          | 69,94       |
| eDC       | E13 | Liver  | 72,3          | 74,9          | 73,8          | 73,65       |
| eDC       | E13 | Liver  | 69,9          | 72,1          | 69,9          | 70,63       |
| eDC       | E13 | Liver  | 63,6          | 68,4          | 69,5          | 67,17       |
| Control   | PN4 | Liver  | 58,0          | 56,5          | 53,0          | 55,81       |
| Control   | PN4 | Liver  | 63,2          | 56,1          | 55,1          | 58,10       |
| Control   | PN4 | Liver  | 57,0          | 47,9          | 49,6          | 51,51       |
| Control   | PN4 | Liver  | 55,2          | 54,2          | 51,1          | 53,49       |
| aNK       | PN4 | Liver  | 69,0          | 64,9          | 57,8          | 63,89       |
| aNK       | PN4 | Liver  | 62,6          | 61,2          | 57,9          | 60,58       |
| aNK       | PN4 | Liver  | 55,9          | 56,8          | 52,1          | 54,94       |
| aNK       | PN4 | Liver  | 64,6          | 63,6          | 56,1          | 61,45       |
| eDC       | PN4 | Liver  | 70,2          | 64,7          | 68,6          | 67,81       |
| eDC       | PN4 | Liver  | 61,5          | 55,6          | 54,8          | 57,30       |
| eDC       | PN4 | Liver  | 62,4          | 56,6          | 57,5          | 58,85       |
| eDC       | PN4 | Liver  | 70,0          | 63,2          | 64,0          | 65,74       |
| Control   | E13 | Kidney | 89,2          | 79,9          | 79,6          | 82,88       |
| Control   | E13 | Kidney | 87,1          | 75,1          | 75,9          | 79,37       |
| Control   | E13 | Kidney | 84,6          | 80,1          | 77,6          | 80,78       |
| Control   | E13 | Kidney | 89,4          | 80,7          | 74,2          | 81,44       |
| aNK       | E13 | Kidney | 94,2          | 80,2          | 77,7          | 84,03       |
| aNK       | E13 | Kidney | 95,1          | 83,3          | 81,6          | 86,65       |
| aNK       | E13 | Kidney | 89,4          | 80,2          | 79,4          | 83,02       |
| aNK       | E13 | Kidney | 93,6          | 84,2          | 84,8          | 87,51       |
| eDC       | E13 | Kidney | 92,8          | 85,0          | 74,8          | 84,18       |
| eDC       | E13 | Kidney | 89,6          | 82,1          | 80,1          | 83,91       |
| eDC       | E13 | Kidney | 93,1          | 84,9          | 81,1          | 86,33       |
| eDC       | E13 | Kidney | 91,8          | 83,3          | 76,0          | 83,70       |
| Control   | PN4 | Kidney | 87,9          | 81,8          | 75,0          | 81,54       |
| Control   | PN4 | Kidney | 84,0          | 76,3          | 72,9          | 77,73       |
| Control   | PN4 | Kidney | 89,2          | 76,2          | 76,3          | 80,55       |
| Control   | PN4 | Kidney | 90,2          | 78,3          | 75,4          | 81,31       |
| aNK       | PN4 | Kidney | 90,7          | 80,0          | 77,7          | 82,79       |
| aNK       | PN4 | Kidney | 88,4          | 77,7          | 75,8          | 80,63       |
| aNK       | PN4 | Kidney | 91,4          | 79,3          | 76,4          | 82,37       |
| aNK       | PN4 | Kidney | 94,1          | 78,3          | 77,7          | 83,35       |
| eDC       | PN4 | Kidney | 90,8          | 76,5          | 69,7          | 79,03       |
| eDC       | PN4 | Kidney | 89,5          | 80,0          | 73,9          | 81,15       |
| eDC       | PN4 | Kidney | 84,2          | 76,0          | 70,1          | 76,77       |
| eDC       | PN4 | Kidney | 85,1          | 78,4          | 71,8          | 78,42       |

**PGC1A**

| Treatment | Age | Tissue | Pgc1a_1_CpG1 | Pgc1a_1_CpG2 | Pgc1a_Total |
|-----------|-----|--------|--------------|--------------|-------------|
| Control   | E13 | Brain  | 1,9          | 2,5          | 2,20        |
| Control   | E13 | Brain  | 1,5          | 1,2          | 1,32        |
| Control   | E13 | Brain  | 1,7          | 4,8          | 3,25        |
| Control   | E13 | Brain  | 1,7          | 3,0          | 2,36        |
| aNK       | E13 | Brain  | 3,6          | 3,4          | 3,48        |
| aNK       | E13 | Brain  | 1,4          | 5,9          | 3,67        |
| aNK       | E13 | Brain  | 2,7          | 3,6          | 3,17        |
| aNK       | E13 | Brain  | 2,6          | 2,4          | 2,47        |
| eDC       | E13 | Brain  | 2,9          | 4,3          | 3,58        |
| eDC       | E13 | Brain  | 5,6          | 7,4          | 6,50        |
| eDC       | E13 | Brain  | 1,6          | 1,6          | 1,60        |
| eDC       | E13 | Brain  | 2,5          | 1,5          | 2,00        |
| Control   | PN4 | Brain  | 2,9          | 3,5          | 3,21        |
| Control   | PN4 | Brain  | 3,7          | 5,8          | 4,75        |
| Control   | PN4 | Brain  | 3,4          | 4,4          | 3,89        |
| Control   | PN4 | Brain  | 5,7          | 4,7          | 5,23        |
| aNK       | PN4 | Brain  | 3,8          | 2,5          | 3,15        |
| aNK       | PN4 | Brain  | 4,6          | 4,7          | 4,63        |
| aNK       | PN4 | Brain  | 4,0          | 3,5          | 3,73        |
| aNK       | PN4 | Brain  | 1,4          | 2,8          | 2,07        |
| eDC       | PN4 | Brain  | 1,8          | 6,9          | 4,31        |
| eDC       | PN4 | Brain  | 3,3          | 2,6          | 2,99        |
| eDC       | PN4 | Brain  | 1,7          | 4,1          | 2,93        |
| eDC       | PN4 | Brain  | 4,4          | 4,9          | 4,66        |
| Control   | E13 | Liver  | 10,3         | 12,9         | 11,59       |
| Control   | E13 | Liver  | 11,5         | 21,2         | 16,33       |
| Control   | E13 | Liver  | 8,7          | 12,7         | 10,68       |
| Control   | E13 | Liver  | 9,8          | 16,3         | 13,00       |
| aNK       | E13 | Liver  | 12,6         | 14,5         | 13,51       |
| aNK       | E13 | Liver  | 8,8          | 10,0         | 9,37        |
| aNK       | E13 | Liver  | 12,9         | 12,6         | 12,72       |
| aNK       | E13 | Liver  | 11,6         | 15,1         | 13,34       |
| eDC       | E13 | Liver  | 7,2          | 10,1         | 8,67        |
| eDC       | E13 | Liver  | 12,3         | 20,8         | 16,57       |
| eDC       | E13 | Liver  | 12,7         | 15,2         | 13,92       |
| eDC       | E13 | Liver  | 13,1         | 15,8         | 14,42       |
| Control   | PN4 | Liver  | 5,1          | 11,1         | 8,10        |
| Control   | PN4 | Liver  | 12,4         | 5,7          | 9,04        |
| Control   | PN4 | Liver  | 5,2          | 4,4          | 4,76        |
| Control   | PN4 | Liver  | 9,9          | 11,1         | 10,51       |
| aNK       | PN4 | Liver  | 10,2         | 11,3         | 10,76       |
| aNK       | PN4 | Liver  | 6,2          | 12,5         | 9,36        |
| aNK       | PN4 | Liver  | 10,3         | 12,1         | 11,18       |
| aNK       | PN4 | Liver  | 5,5          | 16,3         | 10,88       |
| eDC       | PN4 | Liver  | 3,3          | 11,5         | 7,36        |
| eDC       | PN4 | Liver  | 10,3         | 9,0          | 9,66        |
| eDC       | PN4 | Liver  | 10,5         | 11,2         | 10,89       |
| eDC       | PN4 | Liver  | 5,9          | 4,1          | 5,00        |
| Control   | E13 | Kidney | 4,9          | 2,8          | 3,86        |
| Control   | E13 | Kidney | 5,3          | 3,0          | 4,19        |
| Control   | E13 | Kidney | 3,6          | 3,6          | 3,60        |
| Control   | E13 | Kidney | 8,1          | 6,9          | 7,52        |
| aNK       | E13 | Kidney | 4,2          | 3,5          | 3,88        |
| aNK       | E13 | Kidney | 4,0          | 1,9          | 2,96        |
| aNK       | E13 | Kidney | 4,9          | 4,2          | 4,54        |
| aNK       | E13 | Kidney | 2,9          | 3,5          | 3,20        |
| eDC       | E13 | Kidney | 1,6          | 3,9          | 2,73        |
| eDC       | E13 | Kidney | 3,4          | 2,1          | 2,75        |
| eDC       | E13 | Kidney | 4,1          | 2,2          | 3,15        |
| eDC       | E13 | Kidney | 9,3          | 5,9          | 7,61        |
| Control   | PN4 | Kidney | 4,3          | 4,6          | 4,44        |
| Control   | PN4 | Kidney | 3,3          | 3,6          | 3,44        |
| Control   | PN4 | Kidney | 3,0          | 2,9          | 2,97        |
| Control   | PN4 | Kidney | 3,6          | 3,6          | 3,60        |
| aNK       | PN4 | Kidney | 4,5          | 3,1          | 3,78        |
| aNK       | PN4 | Kidney | 3,9          | 4,8          | 4,35        |
| aNK       | PN4 | Kidney | 2,9          | 4,2          | 3,55        |
| aNK       | PN4 | Kidney | 3,9          | 3,4          | 3,63        |
| eDC       | PN4 | Kidney | 7,5          | 6,1          | 6,76        |
| eDC       | PN4 | Kidney | 4,9          | 6,4          | 5,68        |
| eDC       | PN4 | Kidney | 4,5          | 2,0          | 3,24        |
| eDC       | PN4 | Kidney | 2,7          | 2,4          | 2,53        |

## NR3C1

| Treatment | Age | Tissue | Nr3c1_CpG1 | Nr3c1_CpG2 | Nr3c1_CpG3 | Nr3c1_CpG4 | Nr3c1_CpG5 | Nr3c1_CpG6 | Nr3c1_CpG7 | Nr3c1_CpG8 | Nr3c1_CpG9 | Nr3c1_CpG10 | Nr3c1_CpG11 | Nr3c1_CpG12 | Nr3c1_CpG13 | Nr3c1_Total |
|-----------|-----|--------|------------|------------|------------|------------|------------|------------|------------|------------|------------|-------------|-------------|-------------|-------------|-------------|
| Control   | E13 | Brain  | 1,6        | 1,4        | 2,0        | 0,6        | 0,6        | 0,5        | 0,6        | 1,8        | 0,5        | 0,8         | 0,8         | 2,0         | 1,1         | 1,10        |
| Control   | E13 | Brain  | 1,0        | 1,6        | 1,0        | 0,7        | 1,7        | 0,8        | 0,5        | 0,8        | 1,0        | 0,8         | 2,2         | 1,2         | 0,6         | 1,06        |
| Control   | E13 | Brain  | 0,9        | 2,1        | 2,3        | 0,4        | 0,8        | 1,1        | 0,6        | 1,1        | 0,4        | 2,0         | 0,7         | 1,1         | 1,0         | 1,11        |
| Control   | E13 | Brain  | 0,7        | 1,9        | 0,9        | 0,7        | 1,1        | 1,7        | 1,8        | 2,7        | 0,6        | 2,1         | 1,9         | 1,9         | 0,9         | 1,44        |
| aNK       | E13 | Brain  | 0,6        | 2,2        | 1,3        | 0,7        | 4,1        | 0,8        | 3,3        | 4,4        | 1,5        | 3,5         | 0,9         | 1,2         | 0,6         | 1,93        |
| aNK       | E13 | Brain  | 0,9        | 1,9        | 1,3        | 0,7        | 1,2        | 0,8        | 1,3        | 1,7        | 0,9        | 1,8         | 1,2         | 2,2         | 1,5         | 1,32        |
| aNK       | E13 | Brain  | 0,6        | 1,2        | 2,0        | 0,9        | 2,1        | 1,1        | 1,9        | 3,3        | 1,1        | 3,3         | 1,0         | 3,2         | 2,2         | 1,82        |
| aNK       | E13 | Brain  | 1,3        | 1,6        | 1,2        | 0,9        | 0,7        | 0,5        | 0,9        | 1,2        | 1,0        | 2,5         | 1,4         | 2,9         | 1,7         | 1,36        |
| eDC       | E13 | Brain  | 0,5        | 2,3        | 1,1        | 0,5        | 1,3        | 0,8        | 1,2        | 2,4        | 0,7        | 2,0         | 0,7         | 1,8         | 0,9         | 1,23        |
| eDC       | E13 | Brain  | 0,7        | 2,4        | 3,5        | 0,6        | 0,7        | 0,4        | 0,6        | 1,7        | 1,7        | 2,0         | 1,2         | 1,0         | 0,9         | 1,31        |
| eDC       | E13 | Brain  | 0,7        | 2,0        | 1,2        | 1,2        | 1,6        | 0,8        | 0,4        | 1,3        | 1,0        | 1,0         | 0,6         | 1,2         | 1,2         | 1,09        |
| eDC       | E13 | Brain  | 0,6        | 1,5        | 1,0        | 0,8        | 1,0        | 1,8        | 0,7        | 1,6        | 0,7        | 3,0         | 0,9         | 3,8         | 2,2         | 1,50        |
| Control   | PN4 | Brain  | 0,5        | 0,9        | 1,0        | 0,6        | 1,5        | 1,1        | 1,1        | 1,9        | 0,9        | 1,5         | 1,0         | 1,5         | 1,1         | 1,10        |
| Control   | PN4 | Brain  | 1,0        | 2,3        | 2,3        | 0,6        | 0,7        | 1,1        | 0,6        | 1,9        | 0,6        | 3,4         | 0,9         | 1,7         | 1,0         | 1,39        |
| Control   | PN4 | Brain  | 0,5        | 2,6        | 1,7        | 0,8        | 2,7        | 1,7        | 3,5        | 4,6        | 2,1        | 5,9         | 2,1         | 3,7         | 3,6         | 2,73        |
| Control   | PN4 | Brain  | 0,6        | 2,4        | 1,7        | 0,8        | 0,6        | 0,4        | 0,9        | 2,1        | 0,5        | 1,2         | 1,7         | 1,6         | 0,7         | 1,16        |
| aNK       | PN4 | Brain  | 0,8        | 2,2        | 0,9        | 0,6        | 1,2        | 0,7        | 0,9        | 1,4        | 0,6        | 2,3         | 1,7         | 2,2         | 0,4         | 1,22        |
| aNK       | PN4 | Brain  | 0,5        | 1,4        | 1,4        | 1,5        | 2,5        | 0,7        | 2,4        | 3,3        | 0,9        | 3,0         | 1,2         | 2,9         | 1,3         | 1,79        |
| aNK       | PN4 | Brain  | 0,5        | 1,0        | 2,2        | 0,5        | 1,5        | 1,3        | 1,4        | 2,6        | 2,0        | 3,6         | 1,3         | 2,3         | 3,8         | 1,86        |
| aNK       | PN4 | Brain  | 0,5        | 1,6        | 1,0        | 0,8        | 0,6        | 1,7        | 0,8        | 2,8        | 0,6        | 2,1         | 0,8         | 2,9         | 1,5         | 1,47        |
| eDC       | PN4 | Brain  | 0,7        | 3,3        | 2,3        | 1,6        | 1,0        | 0,9        | 1,3        | 2,2        | 1,4        | 3,1         | 2,5         | 3,2         | 3,7         | 2,09        |
| eDC       | PN4 | Brain  | 0,4        | 2,0        | 2,1        | 0,4        | 2,2        | 0,6        | 1,8        | 3,0        | 0,5        | 2,4         | 1,0         | 2,4         | 1,5         | 1,54        |
| eDC       | PN4 | Brain  | 0,5        | 1,4        | 1,2        | 0,6        | 1,3        | 0,9        | 0,7        | 0,9        | 0,8        | 1,5         | 1,1         | 3,5         | 2,7         | 1,31        |
| eDC       | PN4 | Brain  | 0,7        | 1,2        | 0,8        | 0,7        | 1,3        | 0,4        | 0,5        | 1,8        | 1,6        | 2,1         | 1,0         | 1,5         | 1,6         | 1,15        |
| Control   | E13 | Liver  | 1,4        | 1,7        | 2,6        | 0,7        | 0,8        | 0,6        | 0,8        | 2,2        | 0,8        | 1,0         | 1,1         | 3,4         | 1,1         | 1,40        |
| Control   | E13 | Liver  | 0,9        | 3,4        | 1,4        | 0,4        | 0,5        | 1,0        | 1,6        | 2,0        | 1,2        | 0,8         | 0,8         | 1,8         | 0,8         | 1,27        |
| Control   | E13 | Liver  | 0,7        | 1,2        | 0,8        | 0,6        | 5,7        | 0,9        | 4,2        | 4,0        | 0,9        | 3,4         | 1,4         | 2,2         | 1,0         | 2,07        |
| Control   | E13 | Liver  | 0,6        | 2,0        | 1,4        | 0,5        | 0,9        | 1,0        | 0,7        | 2,8        | 0,0        | 0,9         | 0,8         | 1,9         | 0,0         | 1,03        |
| aNK       | E13 | Liver  | 0,7        | 1,6        | 1,3        | 1,4        | 0,7        | 1,5        | 2,2        | 0,9        | 1,2        | 1,7         | 0,7         | 1,4         | 1,6         | 1,29        |
| aNK       | E13 | Liver  | 1,0        | 0,9        | 1,4        | 0,4        | 0,5        | 0,6        | 1,1        | 1,5        | 0,7        | 1,5         | 1,7         | 2,8         | 1,3         | 1,18        |
| aNK       | E13 | Liver  | 0,9        | 1,6        | 0,7        | 0,4        | 0,8        | 2,5        | 1,7        | 2,5        | 1,5        | 4,6         | 1,8         | 4,0         | 5,0         | 2,13        |
| aNK       | E13 | Liver  | 0,6        | 1,3        | 1,6        | 0,5        | 0,7        | 0,4        | 0,6        | 3,6        | 0,6        | 1,8         | 2,0         | 0,9         | 0,9         | 1,19        |
| eDC       | E13 | Liver  | 0,6        | 1,8        | 1,0        | 1,3        | 0,9        | 1,1        | 0,9        | 0,8        | 3,1        | 1,0         | 0,9         | 3,2         | 1,4         | 1,46        |
| eDC       | E13 | Liver  | 1,1        | 1,9        | 0,9        | 0,6        | 1,1        | 0,7        | 0,7        | 1,1        | 0,9        | 1,6         | 1,2         | 2,8         | 1,3         | 1,22        |
| eDC       | E13 | Liver  | 2,1        | 1,5        | 3,3        | 0,4        | 3,3        | 0,4        | 1,1        | 1,8        | 0,5        | 1,0         | 0,8         | 3,0         | 1,8         | 1,40        |
| eDC       | E13 | Liver  | 0,7        | 4,0        | 2,1        | 0,7        | 3,0        | 0,7        | 3,5        | 3,9        | 2,1        | 3,3         | 0,7         | 2,3         | 0,0         | 2,07        |
| Control   | PN4 | Liver  | 0,8        | 0,8        | 1,8        | 0,5        | 5,5        | 0,9        | 4,9        | 6,2        | 1,1        | 5,1         | 1,1         | 3,1         | 1,1         | 2,52        |
| Control   | PN4 | Liver  | 0,6        | 1,6        | 1,1        | 0,4        | 0,8        | 0,5        | 0,8        | 2,8        | 1,2        | 1,5         | 0,6         | 2,9         | 0,8         | 1,20        |
| Control   | PN4 | Liver  | 1,3        | 1,7        | 2,8        | 0,7        | 1,5        | 0,8        | 2,2        | 2,9        | 0,9        | 2,5         | 1,3         | 1,4         | 1,1         | 1,63        |
| Control   | PN4 | Liver  | 0,8        | 1,7        | 2,2        | 0,5        | 0,5        | 0,6        | 0,6        | 1,6        | 1,4        | 1,6         | 0,8         | 2,0         | 1,0         | 1,17        |
| aNK       | PN4 | Liver  | 0,6        | 2,0        | 0,9        | 0,3        | 1,2        | 0,9        | 0,7        | 2,3        | 1,0        | 3,4         | 1,8         | 3,9         | 2,6         | 1,65        |
| aNK       | PN4 | Liver  |            |            |            |            |            |            |            |            |            |             |             |             |             |             |
| aNK       | PN4 | Liver  | 0,7        | 3,7        | 1,2        | 0,5        | 0,7        | 1,0        | 0,8        | 2,9        | 1,3        | 5,2         | 1,0         | 4,1         | 1,8         | 1,90        |
| aNK       | PN4 | Liver  | 1,4        | 2,4        | 2,6        | 0,4        | 2,0        | 0,6        | 2,3        | 5,1        | 0,7        | 3,5         | 1,5         | 4,1         | 0,9         | 2,12        |
| eDC       | PN4 | Liver  | 0,5        | 1,0        | 1,5        | 0,4        | 1,0        | 0,4        | 1,6        | 2,3        | 1,1        | 1,0         | 2,7         | 1,6         | 1,5         | 1,27        |
| eDC       | PN4 | Liver  | 1,0        | 1,1        | 2,2        | 1,0        | 1,8        | 0,7        | 1,4        | 2,9        | 0,7        | 2,6         | 0,7         | 3,4         | 1,2         | 1,59        |
| eDC       | PN4 | Liver  | 0,7        | 1,4        | 1,4        | 0,5        | 0,6        | 0,5        | 0,6        | 2,4        | 0,5        | 1,4         | 3,0         | 1,5         | 1,0         | 1,20        |
| eDC       | PN4 | Liver  | 0,5        | 2,0        | 1,1        | 0,3        | 0,5        | 0,4        | 0,5        | 2,1        | 0,7        | 1,7         | 0,5         | 2,0         | 0,6         | 1,00        |
| Control   | E13 | Kidney | 0,6        | 3,1        | 1,4        | 2,7        | 1,3        | 0,7        | 0,9        | 1,5        | 0,8        | 1,8         | 1,9         | 3,4         | 2,6         | 1,74        |
| Control   | E13 | Kidney | 1,4        | 1,0        | 1,0        | 0,8        | 1,6        | 0,7        | 2,3        | 2,4        | 2,0        | 3,7         | 1,5         | 3,6         | 2,8         | 1,90        |
| Control   | E13 | Kidney | 1,0        | 2,3        | 1,5        | 0,4        | 1,7        | 1,3        | 0,7        | 1,5        | 0,5        | 1,1         | 2,1         | 1,4         | 1,3         | 1,29        |
| Control   | E13 | Kidney | 0,6        | 1,1        | 0,9        | 0,7        | 0,6        | 0,7        | 1,7        | 1,8        | 1,0        | 2,9         | 0,8         | 2,0         | 0,0         | 1,14        |
| aNK       | E13 | Kidney | 0,7        | 1,9        | 1,9        | 0,7        | 1,0        | 0,9        | 0,7        | 1,0        | 1,3        | 1,5         | 0,6         | 1,0         | 0,0         | 1,00        |
| aNK       | E13 | Kidney | 0,7        | 1,8        | 1,2        | 0,6        | 4,3        | 1,2        | 4,0        | 5,4        | 1,3        | 5,2         | 1,4         | 3,9         | 2,4         | 2,58        |
| aNK       | E13 | Kidney | 1,9        | 1,3        | 2,5        | 0,8        | 2,0        | 0,8        | 2,9        | 3,7        | 1,9        | 2,7         | 1,0         | 1,7         | 1,0         | 1,85        |
| aNK       | E13 | Kidney | 1,4        | 1,3        | 1,9        | 0,8        | 2,9        | 0,8        | 2,5        | 3,7        | 1,3        | 2,9         | 1,4         | 2,5         | 1,3         | 1,90        |
| eDC       | E13 | Kidney | 0,7        | 2,3        | 1,3        | 0,5        | 1,8        | 0,7        | 1,8        | 2,7        | 0,7        | 3,2         | 1,5         | 2,0         | 1,3         | 1,57        |
| eDC       | E13 | Kidney | 0,7        | 2,0        | 1,7        | 1,1        | 2,9        | 0,9        | 2,8        | 3,3        | 0,9        | 5,4         | 1,3         | 1,4         | 1,0         | 1,93        |
| eDC       | E13 | Kidney | 1,6        | 1,3        | 1,4        | 0,9        | 1,3        | 0,8        | 0,8        | 1,3        | 1,5        | 1,5         | 1,3         | 2,0         | 2,2         | 1,37        |
| eDC       | E13 | Kidney | 0,7        | 1,4        | 2,5        | 0,6        | 0,6        | 1,4        | 0,6        | 2,2        | 1,9        | 3,6         | 1,6         | 2,6         | 2,0         | 1,67        |
| Control   | PN4 | Kidney | 0,5        | 1,3        | 1,2        | 0,5        | 3,0        | 1,0        | 2,7        | 3,2        | 0,8        | 2,8         | 1,3         | 2,1         | 1,7         | 1,68        |
| Control   | PN4 | Kidney | 0,7        | 1,0        | 2,1        | 0,6        | 1,4        | 0,8        | 0,6        | 2,1        | 1,4        | 1,5         | 1,1         | 2,2         | 0,9         | 1,26        |
| Control   | PN4 | Kidney | 0,6        | 1,9        | 1,4        | 0,5        | 1,8        | 1,0        | 1,5        | 2,2        | 0,9        | 2,4         | 0,8         | 1,7         | 1,2         | 1,36        |
| Control   | PN4 | Kidney | 0,7        | 1,6        | 1,0        | 0,5        | 1,3        | 0,8        | 1,2        | 1,5        | 0,9        | 2,4         | 0,6         | 2,0         | 1,0         | 1,19        |
| aNK       | PN4 | Kidney | 0,8        | 0,9        | 1,5        | 2,1        | 1,9        | 0,9        | 1,1        | 1,4        | 1,6        | 2,6         | 1,1         | 1,5         | 0,9         | 1,40        |
| aNK       | PN4 | Kidney | 1,1        | 2,7        | 1,6        | 0,4        | 1,4        | 0,6        | 2,2        | 2,7        | 1,3        | 2,4         | 1,4         | 3,9         | 2,2         | 1,83        |
| aNK       | PN4 | Kidney | 0,6        | 1,4        | 1,5        | 1,0        | 0,8        | 2,4        | 1,0        | 1,7        | 1,0        | 2,7         | 1,0         | 2,2         | 1,9         | 1,46        |
| aNK       | PN4 | Kidney | 0,7        | 0,9        | 1,0        | 0,5        | 0,6        | 0,7        | 0,9        | 1,6        | 1,4        | 2,2         | 1,0         | 2,4         | 2,1         | 1,22        |
| eDC       | PN4 | Kidney | 0,6        | 1,6        | 1,8        | 1,0        | 1,2        | 1,5        | 0,7        | 1,7        | 0,6        | 1,5         | 0,7         | 1,7         | 1,0         | 1,20        |
| eDC       | PN4 | Kidney | 1,2        | 1,1        | 2,2        | 1,0        | 0,8        | 0,9        | 0,8        | 4,8        | 1,7        | 2,5         | 0,7         | 2,8         | 1,6         | 1,69        |
| eDC       | PN4 | Kidney | 0,7        | 2,8        | 1,6        | 1,3        | 0,9        | 1,0        | 0,7        | 2,1        | 0,8        | 1,1         | 0,8         | 1,5         | 1,1         | 1,25        |
| eDC       | PN4 | Kidney | 0,6        | 0,8        | 0,6        | 0,6        | 0,5        | 0,6        | 0,4        | 0,5        | 0,0        | 0,8         | 0,5         | 1,0         | 0,0         | 0,53        |

## H19

| Treatment | Age | Tissue | H19_DMR_CpG1 | H19_DMR_CpG2 | H19_DMR_CpG3 | H19_DMR_CpG4 | H19_DMR_CpG5 | H19_DMR_CpG6 | H19_Total |
|-----------|-----|--------|--------------|--------------|--------------|--------------|--------------|--------------|-----------|
| Control   | E13 | Brain  | 54,2         | 51,7         | 51,1         | 57,1         | 52,3         | 56,7         | 53,86     |
| Control   | E13 | Brain  | 48,0         | 48,9         | 47,4         | 51,3         | 49,1         | 54,5         | 49,87     |
| Control   | E13 | Brain  | 50,8         | 50,6         | 49,0         | 51,3         | 50,1         | 51,55        | 51,55     |
| Control   | E13 | Brain  | 45,8         | 44,1         | 43,8         | 43,6         | 45,6         | 48,5         | 45,23     |
| aNK       | E13 | Brain  | 51,0         | 48,6         | 48,7         | 51,5         | 52,5         | 55,6         | 51,29     |
| aNK       | E13 | Brain  | 48,8         | 48,7         | 47,0         | 50,5         | 49,1         | 55,0         | 49,86     |
| aNK       | E13 | Brain  | 51,3         | 48,5         | 46,5         | 53,0         | 51,2         | 54,3         | 50,80     |
| aNK       | E13 | Brain  | 44,6         | 44,5         | 43,4         | 46,5         | 44,9         | 50,4         | 45,72     |
| eDC       | E13 | Brain  | 46,3         | 44,7         | 43,5         | 43,8         | 44,5         | 50,0         | 45,47     |
| eDC       | E13 | Brain  | 50,1         | 48,4         | 46,6         | 52,6         | 48,5         | 56,9         | 50,52     |
| eDC       | E13 | Brain  | 45,6         | 44,8         | 41,0         | 47,4         | 45,0         | 50,0         | 45,62     |
| eDC       | E13 | Brain  | 53,6         | 49,5         | 49,0         | 54,1         | 50,9         | 58,0         | 52,51     |
| Control   | PN4 | Brain  | 52,8         | 51,2         | 49,3         | 59,9         | 51,0         | 61,6         | 54,31     |
| Control   | PN4 | Brain  | 50,3         | 49,5         | 46,6         | 52,2         | 49,3         | 56,9         | 50,79     |
| Control   | PN4 | Brain  | 51,7         | 50,4         | 47,5         | 53,1         | 50,8         | 56,4         | 51,64     |
| Control   | PN4 | Brain  | 47,4         | 48,2         | 46,9         | 51,5         | 45,8         | 53,4         | 48,87     |
| aNK       | PN4 | Brain  | 49,6         | 48,1         | 47,0         | 52,2         | 48,3         | 56,3         | 50,23     |
| aNK       | PN4 | Brain  | 41,6         | 39,9         | 37,5         | 42,5         | 40,3         | 46,4         | 41,38     |
| aNK       | PN4 | Brain  | 45,9         | 47,7         | 42,7         | 50,1         | 45,5         | 50,7         | 47,10     |
| aNK       | PN4 | Brain  | 52,3         | 50,7         | 48,5         | 54,3         | 49,8         | 57,0         | 52,09     |
| eDC       | PN4 | Brain  | 42,5         | 42,7         | 40,8         | 43,3         | 42,3         | 45,9         | 42,88     |
| eDC       | PN4 | Brain  | 46,1         | 44,8         | 44,1         | 48,2         | 45,2         | 50,6         | 46,49     |
| eDC       | PN4 | Brain  | 45,9         | 44,9         | 44,4         | 49,3         | 46,2         | 52,5         | 47,19     |
| eDC       | PN4 | Brain  | 49,0         | 48,3         | 45,9         | 51,8         | 48,1         | 54,7         | 49,62     |
| Control   | E13 | Liver  | 47,4         | 45,5         | 43,2         | 50,0         | 45,9         | 53,7         | 47,61     |
| Control   | E13 | Liver  | 48,1         | 45,1         | 43,7         | 49,2         | 48,4         | 52,8         | 47,87     |
| Control   | E13 | Liver  | 50,1         | 51,1         | 49,7         | 52,4         | 50,5         | 56,0         | 51,62     |
| Control   | E13 | Liver  | 50,5         | 52,5         | 49,5         | 54,7         | 53,4         | 64,5         | 54,19     |
| aNK       | E13 | Liver  | 53,6         | 51,3         | 50,2         | 55,2         | 50,7         | 58,0         | 53,17     |
| aNK       | E13 | Liver  | 50,1         | 46,9         | 47,0         | 50,7         | 49,1         | 54,2         | 49,66     |
| aNK       | E13 | Liver  | 42,0         | 40,6         | 39,9         | 42,1         | 39,5         | 46,5         | 41,76     |
| aNK       | E13 | Liver  | 49,4         | 45,4         | 46,3         | 49,7         | 49,3         | 49,8         | 48,30     |
| eDC       | E13 | Liver  | 49,9         | 49,3         | 47,9         | 52,8         | 50,6         | 54,9         | 50,90     |
| eDC       | E13 | Liver  | 49,0         | 46,9         | 46,0         | 51,2         | 47,9         | 53,6         | 49,09     |
| eDC       | E13 | Liver  | 54,7         | 51,0         | 51,3         | 55,8         | 53,9         | 58,7         | 54,22     |
| eDC       | E13 | Liver  | 44,7         | 45,1         | 44,1         | 45,5         | 46,0         | 49,8         | 45,85     |
| Control   | PN4 | Liver  | 42,2         | 41,5         | 39,6         | 41,4         | 42,7         | 48,2         | 42,77     |
| Control   | PN4 | Liver  | 54,5         | 54,2         | 51,4         | 57,7         | 55,0         | 60,6         | 55,56     |
| Control   | PN4 | Liver  | 47,6         | 44,2         | 41,8         | 50,4         | 45,2         | 53,7         | 47,14     |
| Control   | PN4 | Liver  | 50,0         | 47,8         | 46,2         | 52,5         | 45,3         | 55,6         | 49,56     |
| aNK       | PN4 | Liver  | 45,8         | 44,5         | 44,4         | 51,7         | 44,5         | 55,2         | 47,69     |
| aNK       | PN4 | Liver  | 49,8         | 47,5         | 46,6         | 51,8         | 47,7         | 54,9         | 49,70     |
| aNK       | PN4 | Liver  | 57,4         | 51,1         | 49,3         | 65,4         | 50,8         | 47,5         | 53,59     |
| aNK       | PN4 | Liver  | 47,2         | 45,5         | 44,5         | 48,0         | 45,7         | 52,4         | 47,21     |
| eDC       | PN4 | Liver  | 46,8         | 48,5         | 46,8         | 51,0         | 49,7         | 54,6         | 49,54     |
| eDC       | PN4 | Liver  | 46,7         | 44,4         | 44,2         | 49,9         | 45,4         | 52,5         | 47,19     |
| eDC       | PN4 | Liver  | 50,2         | 47,7         | 47,7         | 50,7         | 49,1         | 53,1         | 49,74     |
| eDC       | PN4 | Liver  | 45,7         | 44,0         | 41,9         | 51,2         | 44,6         | 51,7         | 46,49     |
| Control   | E13 | Kidney | 51,7         | 50,3         | 47,8         | 50,6         | 47,7         | 49,7         | 49,63     |
| Control   | E13 | Kidney | 50,2         | 47,6         | 48,5         | 46,7         | 49,1         | 48,47        | 48,47     |
| Control   | E13 | Kidney | 39,4         | 35,4         | 33,9         | 38,7         | 38,4         | 36,5         | 37,05     |
| Control   | E13 | Kidney | 47,7         | 46,9         | 44,7         | 46,8         | 44,0         | 46,9         | 46,17     |
| aNK       | E13 | Kidney | 42,6         | 39,1         | 39,7         | 44,5         | 53,8         | 46,8         | 44,42     |
| aNK       | E13 | Kidney | 44,9         | 42,6         | 43,5         | 45,3         | 45,9         | 44,59        | 44,59     |
| aNK       | E13 | Kidney | 52,0         | 48,4         | 48,2         | 50,2         | 45,8         | 48,5         | 48,84     |
| aNK       | E13 | Kidney | 51,9         | 48,7         | 49,8         | 45,1         | 47,7         | 49,6         | 48,80     |
| eDC       | E13 | Kidney | 45,8         | 42,3         | 42,2         | 40,2         | 43,2         | 39,0         | 42,10     |
| eDC       | E13 | Kidney | 41,6         | 40,9         | 40,1         | 43,7         | 41,1         | 42,1         | 41,57     |
| eDC       | E13 | Kidney | 43,0         | 39,6         | 38,3         | 38,7         | 37,3         | 40,3         | 39,53     |
| eDC       | E13 | Kidney | 49,3         | 47,1         | 46,3         | 47,6         | 46,0         | 46,86        | 46,86     |
| Control   | PN4 | Kidney | 47,3         | 45,2         | 45,3         | 45,4         | 45,5         | 48,4         | 46,17     |
| Control   | PN4 | Kidney | 46,9         | 44,8         | 44,6         | 45,7         | 44,8         | 49,6         | 46,07     |
| Control   | PN4 | Kidney | 53,5         | 49,9         | 53,3         | 53,4         | 54,4         | 54,2         | 53,10     |
| Control   | PN4 | Kidney | 55,4         | 51,9         | 53,2         | 53,5         | 54,7         | 56,5         | 54,22     |
| aNK       | PN4 | Kidney | 53,9         | 49,6         | 51,2         | 53,0         | 51,1         | 51,2         | 51,67     |
| aNK       | PN4 | Kidney | 41,9         | 40,7         | 41,6         | 42,9         | 40,2         | 43,3         | 41,78     |
| aNK       | PN4 | Kidney | 54,7         | 50,1         | 50,2         | 48,8         | 51,3         | 50,89        | 50,89     |
| aNK       | PN4 | Kidney | 49,7         | 47,4         | 45,4         | 51,8         | 47,3         | 52,7         | 49,03     |
| eDC       | PN4 | Kidney | 56,1         | 54,0         | 52,3         | 51,7         | 50,4         | 52,5         | 52,84     |
| eDC       | PN4 | Kidney | 53,2         | 47,4         | 44,3         | 49,0         | 47,1         | 50,4         | 48,57     |
| eDC       | PN4 | Kidney | 57,1         | 51,0         | 51,8         | 51,4         | 51,4         | 51,7         | 52,41     |
| eDC       | PN4 | Kidney | 41,6         | 41,3         | 41,7         | 36,4         | 39,4         | 42,4         | 40,48     |

## IGF2

| IGF2_DMR2_CpG1 | IGF2_DMR2_CpG2 | IGF2_DMR2_CpG3 | IGF2_DMR2_CpG4 | IGF2_DMR2_CpG5 | Igf2_Total |
|----------------|----------------|----------------|----------------|----------------|------------|
| 23,0           | 16,2           | 16,9           | 29,8           | 14,6           | 20,10      |
| 20,3           | 15,6           | 19,1           | 25,7           | 14,5           | 19,05      |
| 20,8           | 12,3           | 17,9           | 26,5           | 11,4           | 17,80      |
| 23,1           | 13,7           | 16,7           | 23,9           | 13,1           | 18,08      |
| 25,2           | 19,5           | 20,3           | 38,2           | 14,2           | 23,48      |
| 25,7           | 18,4           | 20,3           | 36,8           | 14,1           | 23,04      |
| 24,9           | 18,8           | 20,6           | 36,1           | 14,2           | 22,91      |
| 24,7           | 18,1           | 19,7           | 34,8           | 14,0           | 22,26      |
| 23,5           | 16,9           | 19,7           | 34,3           | 14,0           | 21,67      |
| 25,5           | 17,0           | 19,1           | 33,0           | 14,6           | 21,84      |
| 23,6           | 17,7           | 19,3           | 34,7           | 14,9           | 22,06      |
| 23,5           | 16,5           | 17,2           | 33,6           | 13,1           | 20,78      |
| 21,2           | 15,1           | 17,6           | 25,4           | 12,8           | 18,42      |
| 24,4           | 17,4           | 17,0           | 32,6           | 12,7           | 20,82      |
| 24,9           | 19,0           | 20,2           | 37,7           | 14,1           | 23,17      |
| 25,6           | 19,2           | 19,7           | 36,9           | 14,8           | 23,22      |
| 24,6           | 18,2           | 20,5           | 35,2           | 14,0           | 22,50      |
| 24,7           | 17,6           | 19,7           | 35,0           | 14,5           | 22,28      |
| 24,4           | 18,5           | 20,5           | 35,3           | 14,0           | 22,56      |
| 25,4           | 17,2           | 21,0           | 36,2           | 15,3           | 23,01      |
| 19,8           | 14,7           | 20,1           | 32,0           | 13,1           | 19,93      |
| 23,2           | 16,3           | 17,7           | 30,9           | 13,0           | 20,25      |
| 24,0           | 17,4           | 19,5           | 37,0           | 14,3           | 22,44      |
| 24,3           | 17,6           | 20,5           | 35,8           | 14,1           | 22,46      |
| 20,8           | 15,3           | 18,5           | 24,5           | 15,2           | 18,87      |
| 24,8           | 15,3           | 18,0           | 24,8           | 14,9           | 19,37      |
| 19,4           | 15,1           | 19,8           | 26,1           | 14,3           | 18,95      |
| 23,8           | 12,8           | 16,2           | 23,2           | 15,0           | 18,19      |
| 18,9           | 16,7           | 17,4           | 27,2           | 14,3           | 18,91      |
| 20,7           | 14,1           | 18,2           | 27,0           | 15,5           | 19,08      |
| 21,7           | 16,7           | 19,9           | 28,8           | 14,3           | 20,27      |
| 20,0           | 14,8           | 17,7           | 24,3           | 14,7           | 18,29      |
| 22,0           | 14,0           | 17,1           | 28,5           | 12,9           | 18,90      |
| 22,3           | 14,9           | 18,0           | 27,3           | 14,0           | 19,29      |
| 21,0           | 15,5           | 21,1           | 28,7           | 14,7           | 20,19      |
| 24,5           | 16,3           | 18,1           | 29,9           | 13,1           | 20,37      |
| 22,5           | 13,5           | 21,7           | 24,0           | 13,9           | 19,11      |
| 25,0           | 15,2           | 18,4           | 26,2           | 10,1           | 18,99      |
| 19,1           | 13,3           | 17,1           | 24,8           | 13,4           | 17,54      |
| 21,8           | 13,6           | 20,3           | 25,1           | 12,5           | 18,65      |
| 25,5           | 13,8           | 20,1           | 24,5           | 13,7           | 19,49      |
| 21,8           | 16,8           | 17,1           | 26,1           | 12,6           | 18,88      |
| 23,9           | 15,9           | 21,1           | 25,6           | 13,8           | 20,08      |
| 20,5           | 13,9           | 17,8           | 22,7           | 14,2           | 17,80      |
| 22,2           | 16,7           | 20,2           | 29,0           | 13,9           | 20,37      |
| 24,8           | 16,3           | 20,1           | 31,1           | 13,4           | 21,14      |
| 20,5           | 13,3           | 17,9           | 26,7           | 13,3           | 18,34      |
| 22,4           | 15,5           | 18,5           | 28,8           | 13,7           | 19,78      |
| 21,9           | 13,4           | 20,6           | 29,4           | 14,9           | 20,01      |
| 22,8           | 12,7           | 17,4           | 24,1           | 13,7           | 18,15      |
| 20,8           | 12,9           | 16,8           | 22,9           | 13,8           | 17,43      |
| 22,2           | 13,8           | 18,4           | 24,9           | 11,5           | 18,14      |
| 21,4           | 13,3           | 19,1           | 24,9           | 13,1           | 18,36      |
| 27,0           | 15,0           | 19,5           | 29,7           | 14,5           | 21,12      |
| 23,2           | 15,0           | 18,6           | 26,0           | 10,8           | 18,73      |
| 22,0           | 14,2           | 17,9           | 27,5           | 13,4           | 19,00      |
| 24,3           | 15,7           | 19,3           | 34,0           | 13,7           | 21,42      |
| 23,6           | 17,9           | 21,6           | 28,9           | 14,0           | 21,18      |
| 19,6           | 13,2           | 18,2           | 25,8           | 9,5            | 17,26      |
| 20,3           | 12,6           | 16,9           | 24,2           | 13,8           | 17,56      |
| 21,2           | 15,2           | 18,8           | 27,8           | 16,7           | 19,93      |
| 21,6           | 14,0           | 19,9           | 24,8           | 13,6           | 18,77      |
| 21,2           | 16,2           | 19,4           | 26,1           | 15,1           | 19,63      |
| 21,3           | 19,1           | 13,4           | 24,3           | 8,7            | 17,35      |
| 22,8           | 16,6           | 18,6           | 26,0           | 13,6           | 19,52      |
| 24,7           | 15,4           | 18,2           | 29,6           | 13,0           | 20,18      |
| 21,7           | 14,6           | 20,1           | 25,4           | 11,1           | 18,56      |
| 24,5           | 14,4           | 19,3           | 24,7           | 12,7           | 19,13      |
| 21,4           | 13,6           | 19,7           | 25,5           | 12,4           | 18,51      |
| 25,2           | 15,0           | 20,9           | 25,9           | 13,1           | 20,02      |
| 19,0           | 13,1           | 18,9           | 23,5           | 13,0           | 17,49      |
| 24,4           | 15,3           | 18,7           | 26,5           | 15,2           | 20,02      |

## LINE1

| Treatment | Age | Tissue | Line1_Total |
|-----------|-----|--------|-------------|
| Control   | E13 | Brain  | 83,6        |
| Control   | E13 | Brain  | 83,0        |
| Control   | E13 | Brain  | 82,8        |
| Control   | E13 | Brain  | 82,2        |
| aNK       | E13 | Brain  | 83,4        |
| aNK       | E13 | Brain  | 82,4        |
| aNK       | E13 | Brain  | 81,6        |
| aNK       | E13 | Brain  | 82,6        |
| eDC       | E13 | Brain  | 81,6        |
| eDC       | E13 | Brain  | 82,0        |
| eDC       | E13 | Brain  | 80,8        |
| eDC       | E13 | Brain  | 82,2        |
| Control   | PN4 | Brain  | 81,2        |
| Control   | PN4 | Brain  | 82,0        |
| Control   | PN4 | Brain  | 82,8        |
| Control   | PN4 | Brain  | 82,8        |
| aNK       | PN4 | Brain  | 82,0        |
| aNK       | PN4 | Brain  | 81,8        |
| aNK       | PN4 | Brain  | 83,2        |
| aNK       | PN4 | Brain  | 83,4        |
| eDC       | PN4 | Brain  | 83,0        |
| eDC       | PN4 | Brain  | 82,2        |
| eDC       | PN4 | Brain  | 82,2        |
| eDC       | PN4 | Brain  | 81,8        |
| Control   | E13 | Liver  | 72,5        |
| Control   | E13 | Liver  | 73,0        |
| Control   | E13 | Liver  | 72,4        |
| Control   | E13 | Liver  | 72,4        |
| aNK       | E13 | Liver  | 72,6        |
| aNK       | E13 | Liver  | 72,6        |
| aNK       | E13 | Liver  | 72,7        |
| aNK       | E13 | Liver  | 73,0        |
| eDC       | E13 | Liver  | 71,6        |
| eDC       | E13 | Liver  | 73,1        |
| eDC       | E13 | Liver  | 73,5        |
| eDC       | E13 | Liver  | 72,4        |
| Control   | PN4 | Liver  | 79,7        |
| Control   | PN4 | Liver  | 79,5        |
| Control   | PN4 | Liver  | 79,3        |
| Control   | PN4 | Liver  | 81,0        |
| aNK       | PN4 | Liver  | 78,3        |
| aNK       | PN4 | Liver  | 77,9        |
| aNK       | PN4 | Liver  | 77,0        |
| aNK       | PN4 | Liver  | 79,2        |
| eDC       | PN4 | Liver  | 78,6        |
| eDC       | PN4 | Liver  | 78,8        |
| eDC       | PN4 | Liver  | 78,6        |
| eDC       | PN4 | Liver  | 78,4        |
| Control   | E13 | Kidney | 82,4        |
| Control   | E13 | Kidney | 82,0        |
| Control   | E13 | Kidney | 82,4        |
| Control   | E13 | Kidney | 82,8        |
| aNK       | E13 | Kidney | 82,4        |
| aNK       | E13 | Kidney | 82,8        |
| aNK       | E13 | Kidney | 81,6        |
| aNK       | E13 | Kidney | 80,4        |
| eDC       | E13 | Kidney | 82,0        |
| eDC       | E13 | Kidney | 82,8        |
| eDC       | E13 | Kidney | 81,6        |
| eDC       | E13 | Kidney | 83,0        |
| Control   | PN4 | Kidney | 81,8        |
| Control   | PN4 | Kidney | 82,2        |
| Control   | PN4 | Kidney | 82,4        |
| Control   | PN4 | Kidney | 82,6        |
| aNK       | PN4 | Kidney | 81,8        |
| aNK       | PN4 | Kidney | 83,0        |
| aNK       | PN4 | Kidney | 82,2        |
| aNK       | PN4 | Kidney | 82,4        |
| eDC       | PN4 | Kidney | 81,6        |
| eDC       | PN4 | Kidney | 80,8        |
| eDC       | PN4 | Kidney | 82,0        |
| eDC       | PN4 | Kidney | 82,4        |
